# Supplementary material for: Helical pitch and thickness-dependent opto-mechanical response in cholesteric liquid crystal elastomers
Source: Royal Society of Chemistry journal article supplement (doi:10.1039/d5sm00059a), 2025-01-01
Supplement: d5sm00059a1.pdf [file d5sm00059a1.pdf]

# Supplementary Information

## Helical Pitch and Thickness-Dependent Opto-Mechanical

### Response in Cholesteric Liquid Crystal Elastomers

Alexis T. Phillips<sup>a</sup>, Jonathan D. Hoang<sup>b</sup>, Timothy J. White<sup>a,b,\*</sup>

<sup>a</sup>Department of Chemical and Biological Engineering, University of Colorado – Boulder

<sup>b</sup>Materials Science and Engineering Program, University of Colorado – Boulder

\*Correspondence to TJW – Timothy.J.White@colorado.edu

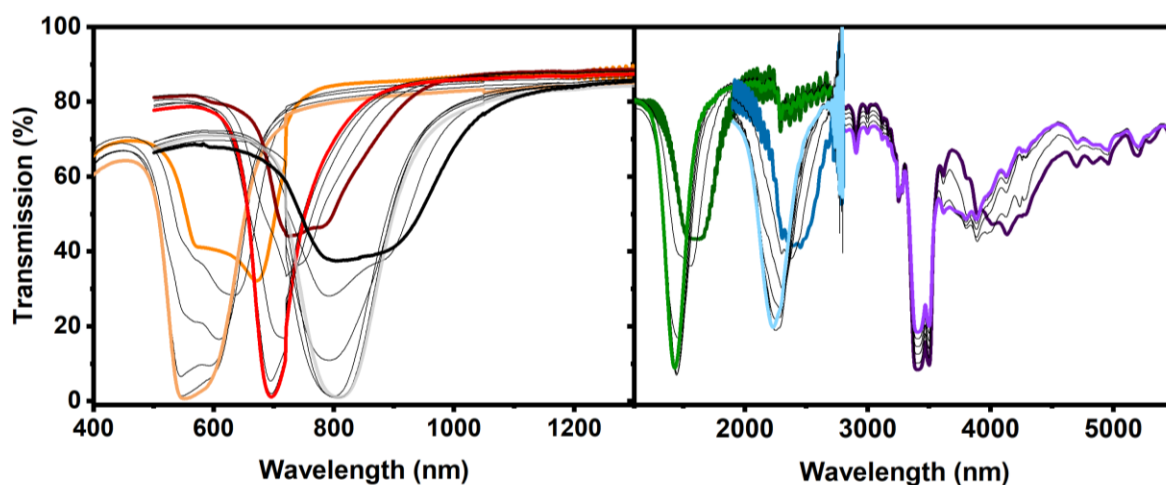

**Figure S1:** Transmission spectra of 50 μm thick CLCEs reflecting across the electromagnetic spectrum from 0% uniaxial strain (right colored spectra) to 50% strain (left colored trace) in increments of 10%.

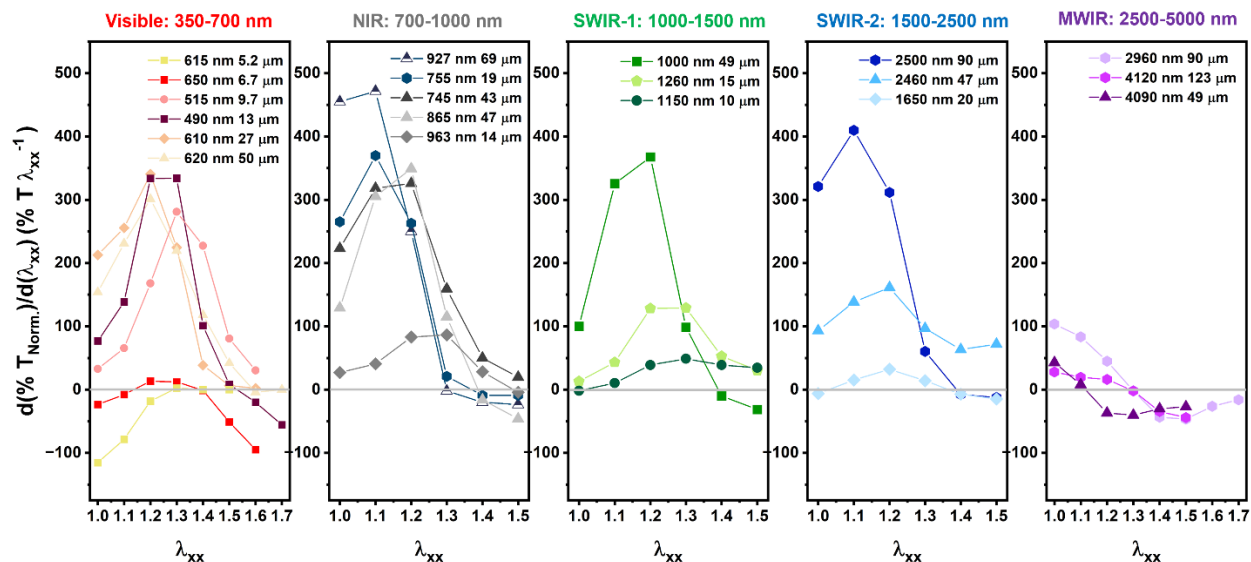

**Figure S2.** The rate of depolarization is represented by the derivative of the normalized transmission vs. strain for all CLCEs.

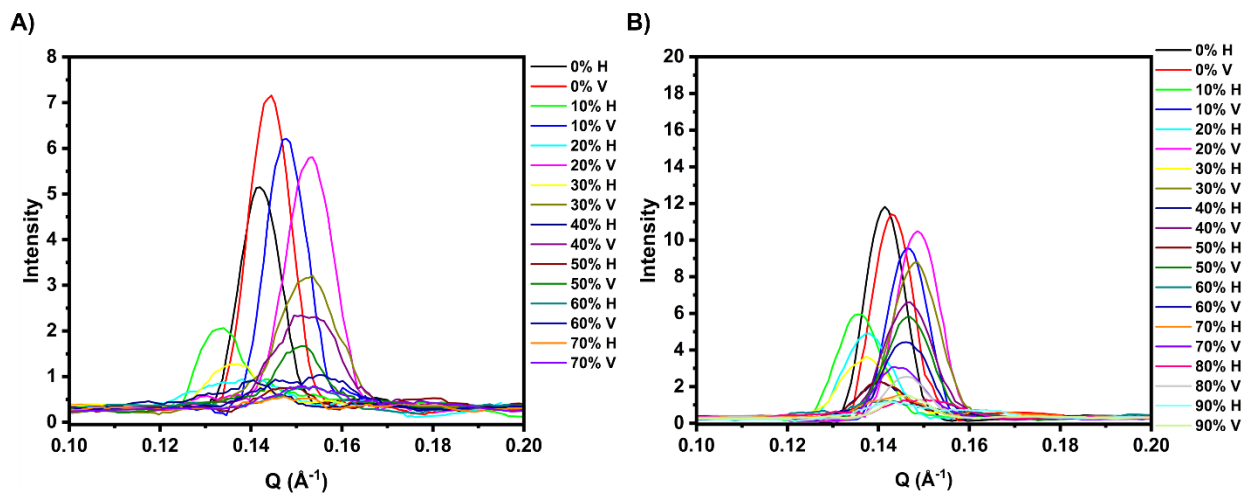

**Figure S3.** SAXS intensity vs. scattering vector plots as a function of strain in both equatorial (H) and meridional (H) directions.
